# Supplementary material for: Dynamics and local environment of an aromatic counterion bound to di-chain cationic surfactant bilayers studied by avoided level crossing muon spin resonance: evidence for counterion condensation
Source: Royal Society of Chemistry journal article supplement (doi:10.1039/d1cp04575j), 2021-01-01
Supplement: d1cp04575j1.pdf [file d1cp04575j1.pdf]

# Electronic Supplementary Information

## Contents

|                                                                         |    |
|-------------------------------------------------------------------------|----|
| DFT Calculations.....                                                   | 1  |
| C <sub>6</sub> H <sub>6</sub> Mu radical .....                          | 1  |
| 3-Mu-246TMB- radical <sup>-</sup> .....                                 | 6  |
| 3-Mu-246TMB- radical <sup>-</sup> isomer 1.....                         | 6  |
| 3-Mu-246TMB- radical – isomer 2 .....                                   | 11 |
| Rotational Averaging of Muon Dipolar Hyperfine Coupling Constants ..... | 15 |
| Solvent Effects on Hyperfine Coupling Constants .....                   | 17 |
| Electric Field Calculations .....                                       | 17 |

## DFT Calculations

The DFT calculations were performed using Gaussian 16 [1] running mostly on the Compute Canada Cedar cluster but with some calculations run on a local Windows 10 machine.

The structures were optimized at the UB3LYP/6-311+G(d,p) level with tight convergence criteria. The hyperfine coupling constants (hfccs) were calculated using the same density functional and basis set used in the optimization. Muonium was treated as an isotope of H with mass 0.113429 u and magnetic moment 8.890597  $\mu_N$ . Vibrational-averaging effects were included by calculating the anharmonic vibrational frequencies and using the Fermi keyword. The values reported here are the vibrationally-averaged values at 0 K. The advantage of this methodology is that there are no empirical factors needed, but it is very computationally expensive.

## C<sub>6</sub>H<sub>6</sub>Mu radical

The DFT calculations were benchmarked using the muoniated cyclohexadienyl radical, which is formed by Mu addition to benzene. The calculated hfccs at 0 K and the experimental hfccs at 298 K are compared in Table S.1.

*Input file*

%mem=120GB

%nprocs=48

%chk=C6H6Mu-fermi.chk

# freq=(Anharmonic,Readanharm) ub3lyp/6-311+g(d,p) geom=connectivity scf=tight

Fermi calculation of the muoniated cyclohexadienyl radical

0 2

|                                |             |             |             |            |                        |
|--------------------------------|-------------|-------------|-------------|------------|------------------------|
| C                              | -0.74010300 | -1.22506600 | -0.00000400 |            |                        |
| C                              | 0.62358400  | -1.25512500 | -0.00001500 |            |                        |
| C                              | 1.44710500  | -0.00000100 | 0.00001700  |            |                        |
| C                              | 0.62358500  | 1.25512400  | -0.00001500 |            |                        |
| C                              | -0.74010100 | 1.22506700  | -0.00000400 |            |                        |
| C                              | -1.45418800 | 0.00000100  | 0.00001400  |            |                        |
| H                              | -1.29446000 | -2.15831200 | -0.00001600 |            |                        |
| H                              | 1.14944000  | -2.20416100 | -0.00003700 |            |                        |
| H                              | 2.13393200  | -0.00000100 | -0.86539400 |            |                        |
| H                              | 1.14944300  | 2.20415900  | -0.00003700 |            |                        |
| H                              | -1.29445700 | 2.15831300  | -0.00001600 |            |                        |
| H                              | -2.53703500 | 0.00000200  | 0.00002700  |            |                        |
| H(Iso=0.113429,NMagM=8.890597) |             |             |             | 2.13384100 | -0.00000100 0.86550500 |

1 2 2.0 6 1.5 7 1.0

2 3 1.0 8 1.0

3 4 1.0 9 1.0 13 1.0

4 5 2.0 10 1.0

5 6 1.5 11 1.0

6 12 1.0

7

8

9

10

11

12

13

Property=Fermi

Optimized structure

---

| Center Number | Atomic Number | Atomic Type | Coordinates (Angstroms) |           |           |
|---------------|---------------|-------------|-------------------------|-----------|-----------|
|               |               |             | X                       | Y         | Z         |
| 1             | 6             | 0           | -1.225065               | -0.697462 | 0.003202  |
| 2             | 6             | 0           | -1.255126               | 0.665985  | -0.022405 |
| 3             | 6             | 0           | -0.000004               | 1.489362  | -0.037908 |
| 4             | 6             | 0           | 1.255123                | 0.665990  | -0.022405 |
| 5             | 6             | 0           | 1.225068                | -0.697455 | 0.003202  |
| 6             | 6             | 0           | 0.000004                | -1.411419 | 0.016599  |
| 7             | 1             | 0           | -2.158310               | -1.251723 | 0.013629  |
| 8             | 1             | 0           | -2.204163               | 1.191746  | -0.032262 |
| 9             | 1             | 0           | -0.000005               | 2.192326  | 0.814448  |
| 10            | 1             | 0           | 2.204157                | 1.191758  | -0.032262 |
| 11            | 1             | 0           | 2.158315                | -1.251712 | 0.013629  |
| 12            | 1             | 0           | 0.000007                | -2.494075 | 0.036929  |
| 13            | 1             | 0           | -0.000005               | 2.159718  | -0.916144 |

---

Isotropic hyperfine coupling constants

---

Temperature: 0K

---

| Atom    | Isotropic Fermi Contact Couplings |                  |           |                                  |
|---------|-----------------------------------|------------------|-----------|----------------------------------|
|         | a.u.                              | MegaHertz        | Gauss     | 10(-4) cm-1                      |
| 1 C(13) | -0.03103                          | -34.88842        | -12.44905 | -11.63752                        |
| 2 C(13) | 0.03460                           | 38.90104         | 13.88086  | 12.97599                         |
| 3 C(13) | -0.03143                          | -35.33293        | -12.60767 | -11.78580                        |
| 4 C(13) | 0.03461                           | 38.90317         | 13.88162  | 12.97670                         |
| 5 C(13) | -0.03103                          | -34.88751        | -12.44873 | -11.63722                        |
| 6 C(13) | 0.04338                           | 48.76917         | 17.40205  | 16.26764                         |
| 7 H(1)  | 0.00224                           | 9.99472          | 3.56637   | 3.33388                          |
| 8 H(1)  | -0.00593                          | -26.49161        | -9.45287  | -8.83665                         |
| 9 H(1)  | 0.03026                           | <b>135.24608</b> | 48.25916  | 45.11324 <b>methylene proton</b> |
| 10 H(1) | -0.00593                          | -26.49233        | -9.45312  | -8.83689                         |
| 11 H(1) | 0.00224                           | 9.99372          | 3.56601   | 3.33355                          |
| 12 H(1) | -0.00753                          | -33.67369        | -12.01561 | -11.23233                        |
| 13 H(1) | 0.03847                           | <b>547.37069</b> | 195.31547 | 182.58321 <b>muon</b>            |

Anisotropic hyperfine coupling constants

Temperature: 0K

Anisotropic Spin Dipole Couplings in Principal Axis System

| Atom    | a.u. | MegaHertz | Gauss         | 10(-4)  | cm-1    | Axis    |         |         |                         |
|---------|------|-----------|---------------|---------|---------|---------|---------|---------|-------------------------|
| 1 C(13) | Baa  | -0.1645   | -22.077       | -7.878  | -7.364  | 0.0145  | 0.0139  | 0.9998  |                         |
|         | Bbb  | 0.0689    | 9.244         | 3.299   | 3.084   | 0.8856  | 0.4640  | -0.0193 |                         |
|         | Bcc  | 0.0956    | 12.832        | 4.579   | 4.280   | -0.4641 | 0.8857  | -0.0055 |                         |
| 2 C(13) | Baa  | -0.2334   | -31.318       | -11.175 | -10.447 | 0.2564  | 0.9665  | -0.0133 |                         |
|         | Bbb  | -0.2148   | -28.830       | -10.287 | -9.617  | 0.9665  | -0.2565 | -0.0127 |                         |
|         | Bcc  | 0.4482    | 60.148        | 21.462  | 20.063  | 0.0157  | 0.0096  | 0.9998  |                         |
| 3 C(13) | Baa  | -0.0107   | -1.430        | -0.510  | -0.477  | 0.0000  | 0.9512  | -0.3087 |                         |
|         | Bbb  | 0.0048    | 0.640         | 0.228   | 0.213   | 1.0000  | 0.0000  | 0.0002  |                         |
|         | Bcc  | 0.0059    | 0.790         | 0.282   | 0.263   | -0.0002 | 0.3087  | 0.9512  |                         |
| 4 C(13) | Baa  | -0.2335   | -31.336       | -11.181 | -10.452 | -0.2562 | 0.9665  | -0.0133 |                         |
|         | Bbb  | -0.2149   | -28.844       | -10.292 | -9.621  | 0.9665  | 0.2564  | 0.0127  |                         |
|         | Bcc  | 0.4485    | 60.180        | 21.474  | 20.074  | -0.0157 | 0.0096  | 0.9998  |                         |
| 5 C(13) | Baa  | -0.1646   | -22.085       | -7.880  | -7.367  | -0.0145 | 0.0139  | 0.9998  |                         |
|         | Bbb  | 0.0689    | 9.248         | 3.300   | 3.085   | 0.8855  | -0.4643 | 0.0193  |                         |
|         | Bcc  | 0.0957    | 12.837        | 4.581   | 4.282   | 0.4644  | 0.8856  | -0.0055 |                         |
| 6 C(13) | Baa  | -0.3001   | -40.267       | -14.368 | -13.432 | 1.0000  | -0.0001 | 0.0000  |                         |
|         | Bbb  | -0.2738   | -36.743       | -13.111 | -12.256 | 0.0001  | 1.0000  | -0.0049 |                         |
|         | Bcc  | 0.5739    | 77.010        | 27.479  | 25.688  | -0.0000 | 0.0049  | 1.0000  |                         |
| 7 H(1)  | Baa  | -0.0071   | -3.803        | -1.357  | -1.269  | 0.0026  | 0.0028  | 1.0000  |                         |
|         | Bbb  | -0.0017   | -0.931        | -0.332  | -0.310  | 0.8432  | 0.5375  | -0.0037 |                         |
|         | Bcc  | 0.0089    | 4.734         | 1.689   | 1.579   | -0.5375 | 0.8432  | -0.0010 |                         |
| 8 H(1)  | Baa  | -0.0280   | -14.943       | -5.332  | -4.984  | 0.4716  | 0.8817  | -0.0125 |                         |
|         | Bbb  | -0.0022   | -1.163        | -0.415  | -0.388  | 0.0194  | 0.0038  | 0.9998  |                         |
|         | Bcc  | 0.0302    | 16.106        | 5.747   | 5.372   | 0.8816  | -0.4717 | -0.0153 |                         |
| 9 H(1)  | Baa  | -0.0065   | <b>-3.444</b> | -1.229  | -1.149  | 0.0001  | -0.3976 | 0.9175  |                         |
|         | Bbb  | -0.0002   | <b>-0.128</b> | -0.046  | -0.043  | 1.0000  | -0.0000 | -0.0001 | <b>methylene proton</b> |
|         | Bcc  | 0.0067    | <b>3.572</b>  | 1.275   | 1.192   | 0.0001  | 0.9175  | 0.3976  |                         |
| 10 H(1) | Baa  | -0.0280   | -14.946       | -5.333  | -4.985  | -0.4715 | 0.8818  | -0.0125 |                         |
|         | Bbb  | -0.0022   | -1.165        | -0.416  | -0.389  | -0.0194 | 0.0039  | 0.9998  |                         |
|         | Bcc  | 0.0302    | 16.111        | 5.749   | 5.374   | 0.8817  | 0.4717  | 0.0153  |                         |

|         |     |         |               |        |        |         |         |                    |
|---------|-----|---------|---------------|--------|--------|---------|---------|--------------------|
| 11 H(1) | Baa | -0.0071 | -3.804        | -1.357 | -1.269 | -0.0026 | 0.0028  | 1.0000             |
|         | Bbb | -0.0017 | -0.932        | -0.333 | -0.311 | 0.8427  | -0.5383 | 0.0037             |
|         | Bcc | 0.0089  | 4.736         | 1.690  | 1.580  | 0.5383  | 0.8427  | -0.0010            |
| 12 H(1) | Baa | -0.0372 | -19.859       | -7.086 | -6.624 | 1.0000  | -0.0001 | 0.0000             |
|         | Bbb | 0.0005  | 0.261         | 0.093  | 0.087  | -0.0000 | 0.0079  | 1.0000             |
|         | Bcc | 0.0367  | 19.598        | 6.993  | 6.537  | 0.0001  | 1.0000  | -0.0079            |
| 13 H(1) | Baa | -0.0052 | <b>-8.909</b> | -3.179 | -2.972 | -0.0001 | 0.4956  | 0.8686             |
|         | Bbb | 0.0002  | <b>0.358</b>  | 0.128  | 0.119  | 1.0000  | -0.0000 | 0.0001 <b>muon</b> |
|         | Bcc | 0.0050  | <b>8.551</b>  | 3.051  | 2.852  | 0.0001  | 0.8686  | -0.4956            |

Table S.1: Experimental isotropic hfccs at 298 K [2,3] and calculated isotropic hfccs of the muoniated cyclohexadienyl radical and the absolute percent difference between these values.

|               | Experimental Hfcc (MHz) | Calculated Hfcc (MHz) | Absolute % Difference |
|---------------|-------------------------|-----------------------|-----------------------|
| $A_{\mu}$     | 514.409(13)             | 547.4                 | 6.4                   |
| $A_p$ (H6)    | 126.11(4)               | 135.2                 | 7.2                   |
| $A_p$ (H1,H5) | -25.14(4)               | -26.5                 | 5.4                   |
| $A_p$ (H2,H4) | 7.47(4)                 | 10.0                  | 33.9                  |
| $A_p$ (H3)    | -36.19(4)               | -33.7                 | 6.9                   |

There is reasonably good agreement between the calculated and experimental values of the isotropic hfccs for every nucleus except for the meta protons, where the proton hfcc is relatively small. The calculated values are about 6-7 % larger than the experimental values. This is very good agreement given that there are no empirical factors in the calculation and suggests that the computational methodology is suitable for calculating isotropic muon and methylene proton hfccs in a muoniated cyclohexadienyl radical.

There is also good agreement between the calculated and experimental dipolar hfccs. There is a large positive principal component of +8.551 MHz that was oriented at an angle of 30° with respect to the molecular plane, which roughly corresponds to the direction of the C-Mu bond. This was nearly balanced by a negative out-of-plane component of -8.909 MHz, which leaves only a small in-plane principal component of +0.358 MHz. Roduner et al. used the values determined for the Mu adduct of durene and suggested that the principal components of the muon hyperfine tensor of the C<sub>6</sub>H<sub>6</sub>Mu radical should be +9.4, -10.4, and +1.0 MHz, respectively.<sup>4</sup> The calculated angle of 30° is slightly higher than the of 25° found in the Mu adduct of durene.<sup>5</sup>

### 3-Mu-246TMB- radical<sup>-</sup>

The optimized structure of 3-Mu-246TMB- has different amounts of spin density on the methylene protons due to the position of the methyl groups. At the temperatures where these measurements were performed, the methyl groups should be freely rotating. To mimic this, we averaged the two structures.

### 3-Mu-246TMB- radical<sup>-</sup> isomer 1

#### Input file

```
%mem=120GB
%nprocs=48
%chk=3-Mu-246TBA-freq1-vacuum.chk
# freq=(Anharmonic,Readanharm) ub3lyp/6-311+g(d,p) geom=connectivity scf=tight
```

Fermi calculation of 3-Mu-246TBA anion in a vacuum

-1 2

```
C      1.56821100  1.23375400  0.09197500
C      0.06153500  1.20267100  0.04522400
C     -0.63576200  0.02344600 -0.01147300
C      0.06341800 -1.22784600 -0.06307800
C      1.48034300 -1.23571500 -0.07583800
C      2.24250600 -0.10186300 -0.00559400
H(Iso=0.113429,NMagM=8.890597) 1.94611300 1.90093600 -0.71061100
H      1.98567700 -2.19906400 -0.14213800
C     -2.18366800  0.00632800  0.00447400
O     -2.68843600 -0.47616900  1.04588100
O     -2.75216700  0.46494300 -1.01346800
H      1.89960700  1.75083000  1.01842600
C      3.74205100 -0.12118400 -0.01274500
H      4.15782700  0.33816200  0.89691800
H      4.13127300 -1.14132700 -0.08072300
H      4.15136000  0.45294700 -0.85776300
C     -0.69618600 -2.52570100 -0.11210000
H     -1.32782800 -2.63624200  0.77461400
H     -1.37786500 -2.55336400 -0.97062000
H     -0.01476400 -3.37962800 -0.18460500
C     -0.60054400  2.54994300  0.08981800
H     -0.22721100  3.19332100 -0.72088600
H     -1.68117700  2.46857500 -0.01732600
H     -0.36961100  3.07167600  1.03143800
```

1 2 1.0 6 1.0 7 1.0 12 1.0

2 3 2.0 21 1.0

3 4 1.5 9 1.0

4 5 1.5 17 1.0

5 6 2.0 8 1.0

6 13 1.0

7

8  
 9 10 2.0 11 2.0  
 10  
 11  
 12  
 13 14 1.0 15 1.0 16 1.0  
 14  
 15  
 16  
 17 18 1.0 19 1.0 20 1.0  
 18  
 19  
 20  
 21 22 1.0 23 1.0 24 1.0  
 22  
 23  
 24

Property=Fermi

*Optimized structure*

| Center Number | Atomic Number | Atomic Type | Coordinates (Angstroms) |           |           |
|---------------|---------------|-------------|-------------------------|-----------|-----------|
|               |               |             | X                       | Y         | Z         |
| 1             | 6             | 0           | 1.568211                | 1.233754  | 0.091975  |
| 2             | 6             | 0           | 0.061535                | 1.202671  | 0.045224  |
| 3             | 6             | 0           | -0.635762               | 0.023446  | -0.011473 |
| 4             | 6             | 0           | 0.063418                | -1.227846 | -0.063078 |
| 5             | 6             | 0           | 1.480343                | -1.235715 | -0.075838 |
| 6             | 6             | 0           | 2.242506                | -0.101863 | -0.005594 |
| 7             | 1             | 0           | 1.946113                | 1.900936  | -0.710611 |
| 8             | 1             | 0           | 1.985677                | -2.199064 | -0.142138 |
| 9             | 6             | 0           | -2.183668               | 0.006328  | 0.004474  |
| 10            | 8             | 0           | -2.688436               | -0.476169 | 1.045881  |
| 11            | 8             | 0           | -2.752167               | 0.464943  | -1.013468 |
| 12            | 1             | 0           | 1.899607                | 1.750830  | 1.018426  |
| 13            | 6             | 0           | 3.742051                | -0.121184 | -0.012745 |
| 14            | 1             | 0           | 4.157827                | 0.338162  | 0.896918  |
| 15            | 1             | 0           | 4.131273                | -1.141327 | -0.080723 |
| 16            | 1             | 0           | 4.151360                | 0.452947  | -0.857763 |
| 17            | 6             | 0           | -0.696186               | -2.525701 | -0.112100 |
| 18            | 1             | 0           | -1.327828               | -2.636242 | 0.774614  |
| 19            | 1             | 0           | -1.377865               | -2.553364 | -0.970620 |
| 20            | 1             | 0           | -0.014764               | -3.379628 | -0.184605 |
| 21            | 6             | 0           | -0.600544               | 2.549943  | 0.089818  |

|    |   |   |           |          |           |
|----|---|---|-----------|----------|-----------|
| 22 | 1 | 0 | -0.227211 | 3.193321 | -0.720886 |
| 23 | 1 | 0 | -1.681177 | 2.468575 | -0.017326 |
| 24 | 1 | 0 | -0.369611 | 3.071676 | 1.031438  |

---

*Isotropic hyperfine coupling constant*

---

Temperature: OK

---

Isotropic Fermi Contact Couplings

| Atom     | a.u.     | MegaHertz        | Gauss     | 10(-4) cm-1 |                         |
|----------|----------|------------------|-----------|-------------|-------------------------|
| 1 C(13)  | -0.02805 | -31.53576        | -11.25274 | -10.51920   |                         |
| 2 C(13)  | 0.03031  | 34.07331         | 12.15820  | 11.36563    |                         |
| 3 C(13)  | -0.02748 | -30.88738        | -11.02138 | -10.30292   |                         |
| 4 C(13)  | 0.04016  | 45.14458         | 16.10871  | 15.05861    |                         |
| 5 C(13)  | -0.03078 | -34.60753        | -12.34883 | -11.54383   |                         |
| 6 C(13)  | 0.03394  | 38.16056         | 13.61664  | 12.72899    |                         |
| 7 H(1)   | 0.03220  | <b>458.16510</b> | 163.48470 | 152.82743   | <b>muon</b>             |
| 8 H(1)   | 0.00207  | 9.25364          | 3.30193   | 3.08668     |                         |
| 9 C(13)  | 0.00316  | 3.55583          | 1.26881   | 1.18610     |                         |
| 10 O(17) | -0.00113 | 0.68798          | 0.24549   | 0.22949     |                         |
| 11 O(17) | -0.00082 | 0.50009          | 0.17844   | 0.16681     |                         |
| 12 H(1)  | 0.02560  | <b>114.44697</b> | 40.83752  | 38.17540    | <b>methylene proton</b> |
| 13 C(13) | -0.01373 | -15.43688        | -5.50826  | -5.14919    |                         |
| 14 H(1)  | 0.00767  | 34.26898         | 12.22802  | 11.43090    |                         |
| 15 H(1)  | 0.00060  | 2.68610          | 0.95847   | 0.89599     |                         |
| 16 H(1)  | 0.00785  | 35.09383         | 12.52235  | 11.70604    |                         |
| 17 C(13) | -0.01638 | -18.41399        | -6.57057  | -6.14225    |                         |
| 18 H(1)  | 0.01179  | 52.70375         | 18.80601  | 17.58008    |                         |
| 19 H(1)  | 0.01150  | 51.42087         | 18.34825  | 17.15216    |                         |
| 20 H(1)  | 0.00109  | 4.87764          | 1.74046   | 1.62701     |                         |
| 21 C(13) | -0.01159 | -13.03487        | -4.65117  | -4.34796    |                         |
| 22 H(1)  | 0.00652  | 29.12162         | 10.39132  | 9.71393     |                         |
| 23 H(1)  | 0.00060  | 2.68049          | 0.95647   | 0.89412     |                         |
| 24 H(1)  | 0.00684  | 30.58638         | 10.91398  | 10.20252    |                         |

---

*Anisotropic hyperfine coupling constant*

---

Temperature: OK

---

Anisotropic Spin Dipole Couplings in Principal Axis System

| Atom    | a.u. | MegaHertz | Gauss  | 10(-4) cm-1 | Axes                          |
|---------|------|-----------|--------|-------------|-------------------------------|
| 1 C(13) | Baa  | -0.0166   | -2.227 | -0.795      | -0.743 -0.1417 -0.2964 0.9445 |
|         | Bbb  | 0.0018    | 0.242  | 0.086       | 0.081 0.4729 0.8179 0.3277    |
|         | Bcc  | 0.0148    | 1.984  | 0.708       | 0.662 0.8696 -0.4931 -0.0243  |



|          |     |         |               |         |         |         |         |                                |
|----------|-----|---------|---------------|---------|---------|---------|---------|--------------------------------|
| 2 C(13)  | Baa | -0.2187 | -29.342       | -10.470 | -9.788  | 0.6053  | 0.7943  | 0.0524                         |
|          | Bbb | -0.2061 | -27.650       | -9.866  | -9.223  | 0.7960  | -0.6037 | -0.0433                        |
|          | Bcc | 0.4247  | 56.992        | 20.336  | 19.011  | 0.0028  | -0.0679 | 0.9977                         |
| 3 C(13)  | Baa | -0.1516 | -20.342       | -7.259  | -6.786  | 0.0076  | -0.0668 | 0.9977                         |
|          | Bbb | 0.0662  | 8.877         | 3.168   | 2.961   | 0.9982  | -0.0592 | -0.0116                        |
|          | Bcc | 0.0854  | 11.465        | 4.091   | 3.824   | 0.0599  | 0.9960  | 0.0662                         |
| 4 C(13)  | Baa | -0.2859 | -38.368       | -13.691 | -12.798 | 0.8398  | -0.5414 | -0.0408                        |
|          | Bbb | -0.2726 | -36.585       | -13.054 | -12.203 | 0.5429  | 0.8380  | 0.0544                         |
|          | Bcc | 0.5586  | 74.953        | 26.745  | 25.002  | 0.0047  | -0.0678 | 0.9977                         |
| 5 C(13)  | Baa | -0.1520 | -20.398       | -7.279  | -6.804  | -0.0068 | -0.0613 | 0.9981                         |
|          | Bbb | 0.0622  | 8.348         | 2.979   | 2.785   | -0.4947 | 0.8676  | 0.0499                         |
|          | Bcc | 0.0898  | 12.050        | 4.300   | 4.020   | 0.8690  | 0.4935  | 0.0362                         |
| 6 C(13)  | Baa | -0.2362 | -31.692       | -11.308 | -10.571 | 0.3843  | 0.9212  | 0.0611                         |
|          | Bbb | -0.2239 | -30.047       | -10.722 | -10.023 | 0.9230  | -0.3847 | -0.0056                        |
|          | Bcc | 0.4601  | 61.739        | 22.030  | 20.594  | -0.0183 | -0.0586 | 0.9981                         |
| 7 H(1)   | Baa | -0.0049 | <b>-8.350</b> | -2.980  | -2.785  | 0.1700  | 0.2652  | 0.9491                         |
|          | Bbb | 0.0019  | <b>3.169</b>  | 1.131   | 1.057   | 0.9357  | -0.3454 | -0.0710 <b>muon</b>            |
|          | Bcc | 0.0031  | <b>5.181</b>  | 1.849   | 1.728   | 0.3090  | 0.9002  | -0.3069                        |
| 8 H(1)   | Baa | -0.0071 | -3.769        | -1.345  | -1.257  | -0.0066 | -0.0800 | 0.9968                         |
|          | Bbb | -0.0016 | -0.840        | -0.300  | -0.280  | -0.3570 | 0.9313  | 0.0724                         |
|          | Bcc | 0.0086  | 4.609         | 1.645   | 1.538   | 0.9341  | 0.3554  | 0.0347                         |
| 9 C(13)  | Baa | -0.0064 | -0.857        | -0.306  | -0.286  | 0.0109  | -0.2766 | 0.9609                         |
|          | Bbb | 0.0013  | 0.173         | 0.062   | 0.058   | 0.1339  | 0.9527  | 0.2728                         |
|          | Bcc | 0.0051  | 0.684         | 0.244   | 0.228   | 0.9909  | -0.1257 | -0.0474                        |
| 10 O(17) | Baa | -0.0382 | 2.768         | 0.988   | 0.923   | 0.9117  | 0.2312  | 0.3396                         |
|          | Bbb | 0.0175  | -1.266        | -0.452  | -0.422  | -0.1988 | -0.4752 | 0.8571                         |
|          | Bcc | 0.0208  | -1.501        | -0.536  | -0.501  | -0.3596 | 0.8490  | 0.3873                         |
| 11 O(17) | Baa | -0.0343 | 2.481         | 0.885   | 0.827   | 0.8386  | -0.3214 | -0.4398                        |
|          | Bbb | 0.0155  | -1.118        | -0.399  | -0.373  | 0.4875  | 0.0826  | 0.8692                         |
|          | Bcc | 0.0188  | -1.362        | -0.486  | -0.454  | 0.2431  | 0.9433  | -0.2259                        |
| 12 H(1)  | Baa | -0.0053 | <b>-2.807</b> | -1.001  | -0.936  | -0.1800 | -0.3537 | 0.9179                         |
|          | Bbb | 0.0016  | <b>0.840</b>  | 0.300   | 0.280   | 0.9058  | -0.4235 | 0.0144 <b>methylene proton</b> |
|          | Bcc | 0.0037  | <b>1.967</b>  | 0.702   | 0.656   | 0.3837  | 0.8340  | 0.3966                         |
| 13 C(13) | Baa | -0.0061 | -0.820        | -0.293  | -0.274  | -0.0340 | -0.1140 | 0.9929                         |
|          | Bbb | -0.0038 | -0.516        | -0.184  | -0.172  | 0.1163  | 0.9863  | 0.1172                         |
|          | Bcc | 0.0100  | 1.336         | 0.477   | 0.446   | 0.9926  | -0.1194 | 0.0203                         |

|          |     |         |        |        |        |         |         |         |
|----------|-----|---------|--------|--------|--------|---------|---------|---------|
| 14 H(1)  | Baa | -0.0041 | -2.162 | -0.771 | -0.721 | -0.2641 | 0.2471  | 0.9323  |
|          | Bbb | -0.0034 | -1.793 | -0.640 | -0.598 | 0.0013  | 0.9667  | -0.2558 |
|          | Bcc | 0.0074  | 3.954  | 1.411  | 1.319  | 0.9645  | 0.0664  | 0.2556  |
| 15 H(1)  | Baa | -0.0042 | -2.229 | -0.795 | -0.743 | 0.4430  | 0.8927  | 0.0820  |
|          | Bbb | -0.0031 | -1.634 | -0.583 | -0.545 | -0.0246 | -0.0793 | 0.9965  |
|          | Bcc | 0.0072  | 3.863  | 1.378  | 1.288  | 0.8962  | -0.4435 | -0.0132 |
| 16 H(1)  | Baa | -0.0041 | -2.185 | -0.780 | -0.729 | 0.2170  | -0.0932 | 0.9717  |
|          | Bbb | -0.0033 | -1.743 | -0.622 | -0.581 | -0.0493 | 0.9931  | 0.1062  |
|          | Bcc | 0.0074  | 3.928  | 1.402  | 1.310  | 0.9749  | 0.0709  | -0.2109 |
| 17 C(13) | Baa | -0.0086 | -1.153 | -0.412 | -0.385 | 0.8749  | -0.4843 | 0.0055  |
|          | Bbb | 0.0016  | 0.215  | 0.077  | 0.072  | 0.0050  | 0.0202  | 0.9998  |
|          | Bcc | 0.0070  | 0.938  | 0.335  | 0.313  | 0.4843  | 0.8747  | -0.0201 |
| 18 H(1)  | Baa | -0.0044 | -2.324 | -0.829 | -0.775 | 0.7223  | -0.5188 | 0.4574  |
|          | Bbb | -0.0035 | -1.873 | -0.668 | -0.625 | -0.1893 | 0.4878  | 0.8522  |
|          | Bcc | 0.0079  | 4.196  | 1.497  | 1.400  | 0.6652  | 0.7021  | -0.2541 |
| 19 H(1)  | Baa | -0.0042 | -2.264 | -0.808 | -0.755 | 0.7074  | -0.4633 | -0.5338 |
|          | Bbb | -0.0036 | -1.934 | -0.690 | -0.645 | 0.2079  | -0.5854 | 0.7836  |
|          | Bcc | 0.0079  | 4.198  | 1.498  | 1.400  | 0.6755  | 0.6653  | 0.3178  |
| 20 H(1)  | Baa | -0.0043 | -2.273 | -0.811 | -0.758 | 0.9974  | -0.0706 | -0.0136 |
|          | Bbb | -0.0035 | -1.859 | -0.663 | -0.620 | 0.0092  | -0.0620 | 0.9980  |
|          | Bcc | 0.0077  | 4.132  | 1.474  | 1.378  | 0.0713  | 0.9956  | 0.0612  |
| 21 C(13) | Baa | -0.0051 | -0.680 | -0.243 | -0.227 | -0.0762 | -0.1294 | 0.9887  |
|          | Bbb | -0.0037 | -0.492 | -0.175 | -0.164 | 0.8304  | 0.5406  | 0.1348  |
|          | Bcc | 0.0087  | 1.172  | 0.418  | 0.391  | -0.5519 | 0.8313  | 0.0663  |
| 22 H(1)  | Baa | -0.0039 | -2.092 | -0.747 | -0.698 | 0.0125  | 0.1924  | 0.9812  |
|          | Bbb | -0.0030 | -1.609 | -0.574 | -0.537 | 0.9177  | 0.3876  | -0.0877 |
|          | Bcc | 0.0069  | 3.701  | 1.321  | 1.235  | -0.3972 | 0.9015  | -0.1717 |
| 23 H(1)  | Baa | -0.0039 | -2.106 | -0.752 | -0.703 | 0.5899  | 0.8011  | 0.1018  |
|          | Bbb | -0.0030 | -1.607 | -0.573 | -0.536 | -0.0400 | -0.0969 | 0.9945  |
|          | Bcc | 0.0070  | 3.713  | 1.325  | 1.239  | 0.8065  | -0.5907 | -0.0252 |
| 24 H(1)  | Baa | -0.0039 | -2.061 | -0.735 | -0.687 | 0.2563  | -0.2201 | 0.9412  |
|          | Bbb | -0.0031 | -1.673 | -0.597 | -0.558 | 0.8832  | 0.4490  | -0.1354 |
|          | Bcc | 0.0070  | 3.733  | 1.332  | 1.245  | -0.3928 | 0.8660  | 0.3095  |

3-Mu-246TMB- radical – isomer 2

*Input file*

%nprocshared=6

%chk=3-Mu-246TBA-freq2-vacuum.chk

# freq=(Anharmonic,Readanharm) ub3lyp/6-311+g(d,p) geom=connectivity scf=tight

Fermi calculation of 3-Mu-246TBA anion in a vacuum

-1 2

|                                |             |             |             |  |  |
|--------------------------------|-------------|-------------|-------------|--|--|
| C                              | 1.56821100  | 1.23375400  | 0.09197500  |  |  |
| C                              | 0.06153500  | 1.20267100  | 0.04522400  |  |  |
| C                              | -0.63576200 | 0.02344600  | -0.01147300 |  |  |
| C                              | 0.06341800  | -1.22784600 | -0.06307800 |  |  |
| C                              | 1.48034300  | -1.23571500 | -0.07583800 |  |  |
| C                              | 2.24250600  | -0.10186300 | -0.00559400 |  |  |
| H                              | 1.94611300  | 1.90093600  | -0.71061100 |  |  |
| H                              | 1.98567700  | -2.19906400 | -0.14213800 |  |  |
| C                              | -2.18366800 | 0.00632800  | 0.00447400  |  |  |
| O                              | -2.68843600 | -0.47616900 | 1.04588100  |  |  |
| O                              | -2.75216700 | 0.46494300  | -1.01346800 |  |  |
| H(Iso=0.113429,NMagM=8.890597) | 1.89960700  | 1.75083000  | 1.01842600  |  |  |
| C                              | 3.74205100  | -0.12118400 | -0.01274500 |  |  |
| H                              | 4.15782700  | 0.33816200  | 0.89691800  |  |  |
| H                              | 4.13127300  | -1.14132700 | -0.08072300 |  |  |
| H                              | 4.15136000  | 0.45294700  | -0.85776300 |  |  |
| C                              | -0.69618600 | -2.52570100 | -0.11210000 |  |  |
| H                              | -1.32782800 | -2.63624200 | 0.77461400  |  |  |
| H                              | -1.37786500 | -2.55336400 | -0.97062000 |  |  |
| H                              | -0.01476400 | -3.37962800 | -0.18460500 |  |  |
| C                              | -0.60054400 | 2.54994300  | 0.08981800  |  |  |
| H                              | -0.22721100 | 3.19332100  | -0.72088600 |  |  |
| H                              | -1.68117700 | 2.46857500  | -0.01732600 |  |  |
| H                              | -0.36961100 | 3.07167600  | 1.03143800  |  |  |

1 2 1.0 6 1.0 7 1.0 12 1.0

2 3 2.0 21 1.0

3 4 1.5 9 1.0

4 5 1.5 17 1.0

5 6 2.0 8 1.0

6 13 1.0

7

8

9 10 2.0 11 2.0

10

11

12  
 13 14 1.0 15 1.0 16 1.0  
 14  
 15  
 16  
 17 18 1.0 19 1.0 20 1.0  
 18  
 19  
 20  
 21 22 1.0 23 1.0 24 1.0  
 22  
 23  
 24

Property=Fermi

*Optimized structure*

| Center<br>Number | Atomic<br>Number | Atomic<br>Type | Coordinates (Angstroms) |           |           |
|------------------|------------------|----------------|-------------------------|-----------|-----------|
|                  |                  |                | X                       | Y         | Z         |
| 1                | 6                | 0              | 1.568211                | 1.233754  | 0.091975  |
| 2                | 6                | 0              | 0.061535                | 1.202671  | 0.045224  |
| 3                | 6                | 0              | -0.635762               | 0.023446  | -0.011473 |
| 4                | 6                | 0              | 0.063418                | -1.227846 | -0.063078 |
| 5                | 6                | 0              | 1.480343                | -1.235715 | -0.075838 |
| 6                | 6                | 0              | 2.242506                | -0.101863 | -0.005594 |
| 7                | 1                | 0              | 1.946113                | 1.900936  | -0.710611 |
| 8                | 1                | 0              | 1.985677                | -2.199064 | -0.142138 |
| 9                | 6                | 0              | -2.183668               | 0.006328  | 0.004474  |
| 10               | 8                | 0              | -2.688436               | -0.476169 | 1.045881  |
| 11               | 8                | 0              | -2.752167               | 0.464943  | -1.013468 |
| 12               | 1                | 0              | 1.899607                | 1.750830  | 1.018426  |
| 13               | 6                | 0              | 3.742051                | -0.121184 | -0.012745 |
| 14               | 1                | 0              | 4.157827                | 0.338162  | 0.896918  |
| 15               | 1                | 0              | 4.131273                | -1.141327 | -0.080723 |
| 16               | 1                | 0              | 4.151360                | 0.452947  | -0.857763 |
| 17               | 6                | 0              | -0.696186               | -2.525701 | -0.112100 |
| 18               | 1                | 0              | -1.327828               | -2.636242 | 0.774614  |
| 19               | 1                | 0              | -1.377865               | -2.553364 | -0.970620 |
| 20               | 1                | 0              | -0.014764               | -3.379628 | -0.184605 |
| 21               | 6                | 0              | -0.600544               | 2.549943  | 0.089818  |
| 22               | 1                | 0              | -0.227211               | 3.193321  | -0.720886 |
| 23               | 1                | 0              | -1.681177               | 2.468575  | -0.017326 |
| 24               | 1                | 0              | -0.369611               | 3.071676  | 1.031438  |

*Isotropic hyperfine coupling constants*

Temperature: OK

Isotropic Fermi Contact Couplings

| Atom     | a.u.     | MegaHertz        | Gauss     | 10(-4) cm-1 |                         |
|----------|----------|------------------|-----------|-------------|-------------------------|
| 1 C(13)  | -0.02798 | -31.46018        | -11.22578 | -10.49399   |                         |
| 2 C(13)  | 0.03028  | 34.04443         | 12.14790  | 11.35600    |                         |
| 3 C(13)  | -0.02758 | -31.00937        | -11.06491 | -10.34361   |                         |
| 4 C(13)  | 0.04003  | 44.99720         | 16.05612  | 15.00945    |                         |
| 5 C(13)  | -0.03078 | -34.59943        | -12.34594 | -11.54113   |                         |
| 6 C(13)  | 0.03412  | 38.35181         | 13.68488  | 12.79279    |                         |
| 7 H(1)   | 0.02543  | <b>113.66069</b> | 40.55696  | 37.91312    | <b>methylene proton</b> |
| 8 H(1)   | 0.00207  | 9.26993          | 3.30774   | 3.09212     |                         |
| 9 C(13)  | 0.00315  | 3.53602          | 1.26174   | 1.17949     |                         |
| 10 O(17) | -0.00123 | 0.74379          | 0.26540   | 0.24810     |                         |
| 11 O(17) | -0.00058 | 0.34939          | 0.12467   | 0.11654     |                         |
| 12 H(1)  | 0.03256  | <b>463.23089</b> | 165.29230 | 154.51719   | <b>muon</b>             |
| 13 C(13) | -0.01379 | -15.50158        | -5.53135  | -5.17077    |                         |
| 14 H(1)  | 0.00786  | 35.12494         | 12.53345  | 11.71642    |                         |
| 15 H(1)  | 0.00061  | 2.70779          | 0.96621   | 0.90322     |                         |
| 16 H(1)  | 0.00767  | 34.26968         | 12.22827  | 11.43114    |                         |
| 17 C(13) | -0.01620 | -18.21522        | -6.49964  | -6.07594    |                         |
| 18 H(1)  | 0.01052  | 47.01467         | 16.77600  | 15.68241    |                         |
| 19 H(1)  | 0.01275  | 57.00684         | 20.34146  | 19.01544    |                         |
| 20 H(1)  | 0.00104  | 4.64276          | 1.65665   | 1.54866     |                         |
| 21 C(13) | -0.01154 | -12.97451        | -4.62963  | -4.32783    |                         |
| 22 H(1)  | 0.00651  | 29.11562         | 10.38918  | 9.71192     |                         |
| 23 H(1)  | 0.00062  | 2.79066          | 0.99578   | 0.93086     |                         |
| 24 H(1)  | 0.00682  | 30.47359         | 10.87373  | 10.16490    |                         |

*Anisotropic hyperfine coupling constants*

Temperature: OK

Anisotropic Spin Dipole Couplings in Principal Axis System

| Atom    |     | a.u.    | MegaHertz | Gauss   | 10(-4) cm-1 | Axes    |         |         |
|---------|-----|---------|-----------|---------|-------------|---------|---------|---------|
| 1 C(13) | Baa | -0.0174 | -2.338    | -0.834  | -0.780      | 0.1211  | 0.1433  | 0.9822  |
|         | Bbb | 0.0023  | 0.303     | 0.108   | 0.101       | 0.4801  | 0.8576  | -0.1843 |
|         | Bcc | 0.0152  | 2.035     | 0.726   | 0.679       | 0.8688  | -0.4939 | -0.0351 |
| 2 C(13) | Baa | -0.2189 | -29.373   | -10.481 | -9.798      | 0.6067  | 0.7928  | 0.0579  |
|         | Bbb | -0.2058 | -27.614   | -9.853  | -9.211      | 0.7947  | -0.6066 | -0.0220 |
|         | Bcc | 0.4247  | 56.987    | 20.334  | 19.009      | -0.0177 | -0.0594 | 0.9981  |

|          |     |         |               |         |         |         |         |         |
|----------|-----|---------|---------------|---------|---------|---------|---------|---------|
| 3 C(13)  | Baa | -0.1515 | -20.326       | -7.253  | -6.780  | -0.0166 | -0.0577 | 0.9982  |
|          | Bbb | 0.0664  | 8.916         | 3.182   | 2.974   | 0.9959  | -0.0895 | 0.0114  |
|          | Bcc | 0.0850  | 11.410        | 4.071   | 3.806   | 0.0887  | 0.9943  | 0.0590  |
| 4 C(13)  | Baa | -0.2846 | -38.191       | -13.627 | -12.739 | 0.8304  | -0.5554 | -0.0439 |
|          | Bbb | -0.2711 | -36.377       | -12.980 | -12.134 | 0.5570  | 0.8297  | 0.0380  |
|          | Bcc | 0.5557  | 74.568        | 26.608  | 24.873  | 0.0153  | -0.0560 | 0.9983  |
| 5 C(13)  | Baa | -0.1516 | -20.349       | -7.261  | -6.788  | 0.0154  | -0.0689 | 0.9975  |
|          | Bbb | 0.0621  | 8.331         | 2.973   | 2.779   | -0.4866 | 0.8710  | 0.0677  |
|          | Bcc | 0.0896  | 12.018        | 4.288   | 4.009   | 0.8735  | 0.4864  | 0.0202  |
| 6 C(13)  | Baa | -0.2357 | -31.632       | -11.287 | -10.551 | 0.4088  | 0.9104  | 0.0640  |
|          | Bbb | -0.2232 | -29.945       | -10.685 | -9.988  | 0.9126  | -0.4068 | -0.0422 |
|          | Bcc | 0.4589  | 61.576        | 21.972  | 20.540  | 0.0123  | -0.0756 | 0.9971  |
| 7 H(1)   | Baa | -0.0051 | <b>-2.733</b> | -0.975  | -0.912  | 0.1717  | 0.2375  | 0.9561  |
|          | Bbb | 0.0016  | <b>0.833</b>  | 0.297   | 0.278   | 0.9114  | -0.4066 | -0.0627 |
|          | Bcc | 0.0036  | <b>1.900</b>  | 0.678   | 0.634   | 0.3739  | 0.8822  | -0.2863 |
| 8 H(1)   | Baa | -0.0070 | -3.753        | -1.339  | -1.252  | 0.0206  | -0.0780 | 0.9967  |
|          | Bbb | -0.0016 | -0.837        | -0.299  | -0.279  | -0.3445 | 0.9353  | 0.0803  |
|          | Bcc | 0.0086  | 4.590         | 1.638   | 1.531   | 0.9386  | 0.3450  | 0.0076  |
| 9 C(13)  | Baa | -0.0064 | -0.864        | -0.308  | -0.288  | -0.0071 | -0.2713 | 0.9625  |
|          | Bbb | 0.0012  | 0.166         | 0.059   | 0.055   | 0.1623  | 0.9494  | 0.2688  |
|          | Bcc | 0.0052  | 0.699         | 0.249   | 0.233   | 0.9867  | -0.1581 | -0.0373 |
| 10 O(17) | Baa | -0.0384 | 2.779         | 0.992   | 0.927   | 0.8992  | 0.2387  | 0.3666  |
|          | Bbb | 0.0184  | -1.329        | -0.474  | -0.443  | -0.1804 | -0.5611 | 0.8079  |
|          | Bcc | 0.0200  | -1.450        | -0.517  | -0.484  | -0.3985 | 0.7926  | 0.4615  |
| 11 O(17) | Baa | -0.0325 | 2.353         | 0.840   | 0.785   | 0.8192  | -0.3737 | -0.4350 |
|          | Bbb | 0.0140  | -1.010        | -0.361  | -0.337  | 0.4257  | -0.1120 | 0.8979  |
|          | Bcc | 0.0186  | -1.343        | -0.479  | -0.448  | 0.3843  | 0.9207  | -0.0674 |
| 12 H(1)  | Baa | -0.0050 | <b>-8.446</b> | -3.014  | -2.817  | -0.1743 | -0.3569 | 0.9177  |
|          | Bbb | 0.0019  | <b>3.276</b>  | 1.169   | 1.093   | 0.9125  | -0.4089 | 0.0143  |
|          | Bcc | 0.0030  | <b>5.170</b>  | 1.845   | 1.724   | 0.3701  | 0.8399  | 0.3969  |
| 13 C(13) | Baa | -0.0061 | -0.819        | -0.292  | -0.273  | 0.0239  | -0.0251 | 0.9994  |
|          | Bbb | -0.0039 | -0.521        | -0.186  | -0.174  | 0.1296  | 0.9913  | 0.0218  |
|          | Bcc | 0.0100  | 1.340         | 0.478   | 0.447   | 0.9913  | -0.1290 | -0.0269 |
| 14 H(1)  | Baa | -0.0041 | -2.166        | -0.773  | -0.723  | -0.2175 | -0.0398 | 0.9753  |
|          | Bbb | -0.0033 | -1.753        | -0.626  | -0.585  | -0.0389 | 0.9987  | 0.0321  |
|          | Bcc | 0.0073  | 3.920         | 1.399   | 1.307   | 0.9753  | 0.0310  | 0.2187  |

methylene proton

muon

|          |     |         |        |        |        |         |         |         |
|----------|-----|---------|--------|--------|--------|---------|---------|---------|
| 15 H(1)  | Baa | -0.0042 | -2.222 | -0.793 | -0.741 | 0.4537  | 0.8899  | 0.0481  |
|          | Bbb | -0.0031 | -1.628 | -0.581 | -0.543 | 0.0187  | -0.0635 | 0.9978  |
|          | Bcc | 0.0072  | 3.849  | 1.373  | 1.284  | 0.8910  | -0.4518 | -0.0454 |
| 16 H(1)  | Baa | -0.0040 | -2.154 | -0.769 | -0.719 | 0.2577  | -0.3618 | 0.8959  |
|          | Bbb | -0.0034 | -1.795 | -0.640 | -0.599 | 0.0090  | 0.9281  | 0.3722  |
|          | Bcc | 0.0074  | 3.949  | 1.409  | 1.317  | 0.9662  | 0.0879  | -0.2425 |
| 17 C(13) | Baa | -0.0085 | -1.144 | -0.408 | -0.382 | 0.8684  | -0.4955 | 0.0221  |
|          | Bbb | 0.0016  | 0.213  | 0.076  | 0.071  | -0.0297 | -0.0076 | 0.9995  |
|          | Bcc | 0.0069  | 0.931  | 0.332  | 0.311  | 0.4951  | 0.8686  | 0.0213  |
| 18 H(1)  | Baa | -0.0043 | -2.277 | -0.813 | -0.760 | 0.6168  | -0.4194 | 0.6661  |
|          | Bbb | -0.0036 | -1.944 | -0.694 | -0.649 | -0.3384 | 0.6227  | 0.7055  |
|          | Bcc | 0.0079  | 4.221  | 1.506  | 1.408  | 0.7106  | 0.6606  | -0.2422 |
| 19 H(1)  | Baa | -0.0044 | -2.368 | -0.845 | -0.790 | 0.7470  | -0.5042 | -0.4333 |
|          | Bbb | -0.0034 | -1.822 | -0.650 | -0.608 | 0.1271  | -0.5315 | 0.8375  |
|          | Bcc | 0.0079  | 4.190  | 1.495  | 1.398  | 0.6525  | 0.6807  | 0.3330  |
| 20 H(1)  | Baa | -0.0043 | -2.275 | -0.812 | -0.759 | 0.9883  | -0.0897 | 0.1237  |
|          | Bbb | -0.0034 | -1.835 | -0.655 | -0.612 | -0.1262 | -0.0220 | 0.9918  |
|          | Bcc | 0.0077  | 4.110  | 1.467  | 1.371  | 0.0862  | 0.9957  | 0.0330  |
| 21 C(13) | Baa | -0.0050 | -0.671 | -0.239 | -0.224 | -0.0036 | -0.0427 | 0.9991  |
|          | Bbb | -0.0037 | -0.498 | -0.178 | -0.166 | 0.8416  | 0.5395  | 0.0261  |
|          | Bcc | 0.0087  | 1.169  | 0.417  | 0.390  | -0.5401 | 0.8409  | 0.0340  |
| 22 H(1)  | Baa | -0.0038 | -2.035 | -0.726 | -0.679 | -0.2439 | 0.1164  | 0.9628  |
|          | Bbb | -0.0032 | -1.691 | -0.603 | -0.564 | 0.9007  | 0.3951  | 0.1804  |
|          | Bcc | 0.0070  | 3.726  | 1.329  | 1.243  | -0.3594 | 0.9112  | -0.2013 |
| 23 H(1)  | Baa | -0.0039 | -2.102 | -0.750 | -0.701 | 0.6035  | 0.7963  | 0.0412  |
|          | Bbb | -0.0030 | -1.613 | -0.575 | -0.538 | -0.0191 | -0.0372 | 0.9991  |
|          | Bcc | 0.0070  | 3.715  | 1.325  | 1.239  | 0.7971  | -0.6038 | -0.0072 |
| 24 H(1)  | Baa | -0.0039 | -2.094 | -0.747 | -0.699 | -0.0084 | -0.3096 | 0.9508  |
|          | Bbb | -0.0030 | -1.614 | -0.576 | -0.538 | 0.9175  | 0.3758  | 0.1304  |
|          | Bcc | 0.0070  | 3.708  | 1.323  | 1.237  | -0.3977 | 0.8735  | 0.2809  |

### Rotational Averaging of Muon Dipolar Hyperfine Coupling Constants

The hyperfine tensors obtained from the Gaussian 16 calculations were used to calculate the axial hyperfine tensors that result from rapid uniaxial rotation about an axis. The isotropic muon hfcc,  $A_{\mu}$ , the principal muon dipolar hfccs ( $B_{aa}$ ,  $B_{bb}$  and  $B_{cc}$ ) and the direction cosines ( $\mathbf{R}$ ) for the coordinate system where the dipolar tensor is diagonal (a,b,c) were obtained from the calculations.

$$\begin{array}{l} X H(1) \\ B_{aa} \quad a_1 \ a_2 \ a_3 \\ B_{bb} \quad b_1 \ b_2 \ b_3 \\ B_{cc} \quad c_1 \ c_2 \ c_3 \end{array}$$

$$\mathbf{B}_{(a,b,c)} = \begin{vmatrix} B_{aa} & 0 & 0 \\ 0 & B_{bb} & 0 \\ 0 & 0 & B_{cc} \end{vmatrix} \quad (1.1)$$

The hyperfine tensor  $\mathbf{B}_{(a,b,c)}$  was transformed from the (a,b,c) coordinate system to the (x,y,z) coordinate system of the molecule,  $\mathbf{B}_{(x,y,z)}$ . This is done using the rotation matrix,  $\mathbf{R}$ , and its transpose,  $\mathbf{R}^T$ :

$$\mathbf{R} = \begin{vmatrix} a_1 & a_2 & a_3 \\ b_1 & b_2 & b_3 \\ c_1 & c_2 & c_3 \end{vmatrix} \quad (1.2)$$

$$\mathbf{R}^T = \begin{vmatrix} a_1 & b_1 & c_1 \\ a_2 & b_2 & c_2 \\ a_3 & b_3 & c_3 \end{vmatrix} \quad (1.3)$$

$$\mathbf{B}_{(x,y,z)} = \mathbf{R}^T \cdot \mathbf{B}_{(a,b,c)} \cdot \mathbf{R} \quad (1.4)$$

$\mathbf{B}_{(x,y,z)}$  is generally not diagonal. For an arbitrary, normalized rotation axis in the molecular reference frame,  $\mathbf{n}$ :

$$D_X^{\parallel} = \mathbf{n}^T \cdot \mathbf{B}_{(x,y,z)} \cdot \mathbf{n} \quad (1.5)$$

This simplifies to:

$$D_X^{\parallel} = (\mathbf{n}^T \cdot \mathbf{a})^2 B_{aa} + (\mathbf{n}^T \cdot \mathbf{b})^2 B_{bb} + (\mathbf{n}^T \cdot \mathbf{c})^2 B_{cc} \quad (1.6)$$

where

$$\mathbf{a} = \begin{vmatrix} a_1 \\ a_2 \\ a_3 \end{vmatrix}; \mathbf{b} = \begin{vmatrix} b_1 \\ b_2 \\ b_3 \end{vmatrix}; \mathbf{c} = \begin{vmatrix} c_1 \\ c_2 \\ c_3 \end{vmatrix} \quad (1.7)$$

This makes it possible to calculate  $D_{\mu}^{\parallel}$  for any arbitrary rotation axis. The axial dipolar muon hyperfine tensor of the muoniated radicals were calculated for different rotation axes.

As a test we calculated the  $D_{\mu}^{\parallel}$  for the  $C_6H_6\mu$  radical undergoing rapid rotation about two different axes: perpendicular to the six-membered ring and parallel to the vector connecting the ipso and para carbons. Fast uniaxial rotation about an axis perpendicular to the molecular plane will result in  $D_{\mu}^{\parallel} = -4.62$  MHz. Roduner et al. calculated this value to be -6.8 MHz.<sup>4</sup> Fast uniaxial rotation about the axis connecting the ipso and para carbons will result in  $D_{\mu}^{\parallel} = +4.26$  MHz. Roduner et al. calculated this



value to be +5.8 MHz.<sup>4</sup> The reason for the difference is the slightly different values of the principal components and their orientations. Nevertheless, there is reasonable agreement and the trend in terms of the sign is reproduced.

### Solvent Effects on Hyperfine Coupling Constants

The radical anion and the Na<sup>+</sup> - radical anion ion pair were optimized at the UB3LYP/6-311+G(d,p) level using the conductor-like polarizable continuum model (CPCM).

```
# opt=tight ub3lyp/6-311+g(d,p) scrf=(cpcm,solvent=water) geom=connectivity scf=tight
```

We scaled the computed average proton hfccs of the methylene protons by a factor of 3.82 to predict  $A_{\mu}$  (1.20 for the isotope effect and 3.183 for the muon magnetic moment) and a factor of 0.94 for the corresponding  $A_p$  of the H in a -CHMu- group.

| Solvent          | $\epsilon$ | $(\epsilon-1)/(2\epsilon+1)$ | 3-Mu-246TMB <sup>-</sup> |             | Na <sup>+</sup> -3-Mu-246TMB <sup>-</sup> |             |
|------------------|------------|------------------------------|--------------------------|-------------|-------------------------------------------|-------------|
|                  |            |                              | $A_{\mu}$ (MHz)          | $A_p$ (MHz) | $A_{\mu}$ (MHz)                           | $A_p$ (MHz) |
| Water            | 78.36      | 0.4905                       | 448.07                   | 110.27      | 448.41                                    | 110.35      |
| Methanol         | 32.61      | 0.4774                       | 447.78                   | 110.20      | 448.20                                    | 110.30      |
| Ethanol          | 24.85      | 0.4704                       | 447.63                   | 110.16      | 448.09                                    | 110.28      |
| 1-Pentanol       | 15.13      | 0.4520                       | 447.23                   | 110.06      | 447.82                                    | 110.21      |
| 1-Nonanol        | 8.60       | 0.4176                       | 446.48                   | 109.88      | 447.33                                    | 110.09      |
| n-Methylaniline  | 5.96       | 0.3839                       | 445.75                   | 109.70      | 446.83                                    | 109.97      |
| Diethyl ether    | 4.24       | 0.3418                       | 444.83                   | 109.47      | 446.21                                    | 109.81      |
| Dibutyl ether    | 3.05       | 0.2886                       | 443.67                   | 109.19      | 445.38                                    | 109.61      |
| Carbon disulfide | 2.61       | 0.2589                       | 443.03                   | 109.03      | 444.86                                    | 109.48      |
| Trans-decalin    | 2.18       | 0.2200                       | 442.17                   | 108.82      | 444.00                                    | 109.27      |
| Heptane          | 1.91       | 0.1890                       | 441.46                   | 108.64      | 443.36                                    | 109.11      |

### Electric Field Calculations

The variation in energy with electric field was calculated as a function of the angle  $\theta$ , which is the angle between the electric field and the dipole moment of the 3-Mu-246TMB<sup>-</sup> radical anion, which is essentially along the x axis of Figure 4. There is very little variation with the angle in the y-z plane. The structures were not optimized. Only single point calculations of the energy were performed on the 3-Mu-246TMB<sup>-</sup> radical anion optimized at the UB3LYP/6-311+G(d,p) level.

```
# ub3lyp/6-311+g(d,p) nosymm field=x+20 scf=tight
```

This applies a field of 0.002 au, or  $1.03 \times 10^7$  V/cm, along the x axis. The input coordinates of the optimized structure were rotated in order to apply the electric field along a given axis.

<sup>1</sup> Gaussian 16, Revision C.01, M. J. Frisch, G. W. Trucks, H. B. Schlegel, G. E. Scuseria, M. A. Robb, J. R. Cheeseman, G. Scalmani, V. Barone, G. A. Petersson, H. Nakatsuji, X. Li, M. Caricato, A. V. Marenich, J. Bloino, B. G. Janesko, R. Gomperts, B. Mennucci, H. P. Hratchian, J. V. Ortiz, A. F. Izmaylov, J. L. Sonnenberg, D. Williams-Young, F. Ding, F. Lipparini, F. Egidi, J. Goings, B. Peng, A. Petrone, T. Henderson, D. Ranasinghe, V. G. Zakrzewski, J. Gao, N. Rega, G. Zheng, W. Liang, M. Hada, M. Ehara, K. Toyota, R. Fukuda, J. Hasegawa, M. Ishida, T. Nakajima, Y. Honda, O. Kitao, H. Nakai, T. Vreven, K. Throssell, J. A. Montgomery, Jr., J. E. Peralta, F. Ogliaro, M. J. Bearpark, J. J. Heyd, E. N. Brothers, K. N. Kudin, V. N. Staroverov, T. A. Keith, R. Kobayashi, J. Normand, K. Raghavachari, A. P. Rendell, J. C.

---

Burant, S. S. Iyengar, J. Tomasi, M. Cossi, J. M. Millam, M. Klene, C. Adamo, R. Cammi, J. W. Ochterski, R. L. Martin, K. Morokuma, O. Farkas, J. B. Foresman, and D. J. Fox, Gaussian, Inc., Wallingford CT, 2016.

<sup>2</sup> D. Yu, P. W. Percival, J.-C. Brodovtich, S.-K. Leung, R. F. Kiefl, K. Venkateswaran and S. F. J. Cox, Chem. Phys. 1990, **142**, 229 – 236.

<sup>3</sup> P. W. Percival, R. F. Kiefl, S. R. Kreitzman, D. M. Garner, S. F. J. Cox, G. M. Luke, J. H. Brewer, K. Nishiyama and K. Venkateswaran, Chem. Phys. Lett. 1987, **133**, 465 – 470.

<sup>4</sup> E. Roduner, M. Stolmar, H. Dilger and I. D. Reid, J. Phys. Chem. A 1998, **102**, 7591 – 7597

<sup>5</sup> E. Roduner, Chem. Phys. Lett. 1981, **81**, 191 – 194.
